# Supplementary material
Source: ML conference proceedings conference paper supplement (https://proceedings.neurips.cc/paper_files/paper/2020/hash/c4ede56bbd98819ae6112b20ac6bf145-Abstract.html)
Supplement: Supplementary file [file c4ede56bbd98819ae6112b20ac6bf145-Supplemental.zip]

---

# Supplementary Material: Inverting Gradients - How easy is it to break privacy in federated learning?

---

Anonymous Author(s)

Affiliation

Address

email

## Abstract

1 This supp. material discusses variations of the threat model in Sec. A. It details the  
2 variant used to attack federated averaging (Sec. 6 in the main paper) and ConvNet  
3 architecture in Sec. B. Further, hyperparameter settings for all experiments and  
4 visual representations of the results of Section 4.2 are recorded in C. A proof of  
5 proposition 3.1 of the main paper is included in Sec.D, and finally more examples  
6 for ImageNet-scale images and the full 100 images for the multi-image experiment  
7 of Sec. 6.1 are shown in Sec. E.

## 8 A Variations of the threat model

9 In this work we consider a *honest-but-curious* threat model as discussed in the introduction. Straying  
10 from this scenario could be done primarily in two ways: First by changing the architecture, and  
11 second by keeping the architecture non-malicious, but changing the global parameters sent to the  
12 user.

### 13 A.1 Dishonest Architectures

14 So far we assumed that the server operates under an *honest-but-curious* model, and as such would  
15 not modify the model maliciously to make reconstruction easier. If we instead allow for this, then  
16 reconstruction becomes nearly trivial: Several mechanisms could be used: Following Prop. 1, the  
17 server could, for example, place a fully-connected layer in the first layer, or even directly connect  
18 the input to the end of the network by concatenation. Slightly less obvious, the model could be  
19 modified to contain reversible blocks [1, 3]. These blocks allow the recovery of input from their  
20 outputs. From Prop. 1 we know that we can reconstruct the input to the classification layer, so this  
21 allows for immediate access to the input image. If the server maliciously introduces separate weights  
22 or sub-models for each batch example, then this also allows for a recovery of an arbitrarily large  
23 batch of data. Operating in a setting, where such behavior is possible would require the user (or a  
24 provider trusted by the user) to vet any incoming model either manually or programmatically.

### 25 A.2 Dishonest Parameter Vectors

26 However, even with a fixed *honest* architecture, a malicious choice of global parameters can signif-  
27 icantly influence reconstruction quality. For example, considering the network architecture in [6]  
28 which does not contain strides and flattens convolutional features, the dishonest server could set all  
29 convolution layers to represent the identity [2], moving the input through the network unchanged up to  
30 the classification layer, from which the input can be analytically computed as in Prop. 1. Likewise for

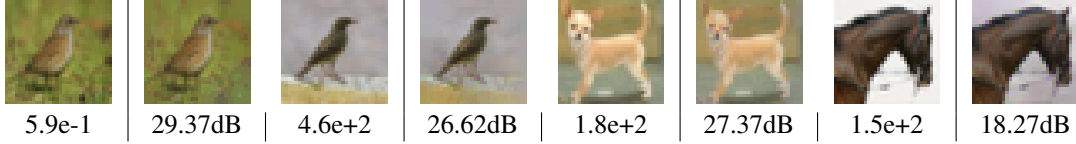

Figure 1: Label flipping. Images can be easily reconstructed when two rows in the parameters of the final classification layer are permuted. Below each input image is given the gradient magnitude, below each output image its PSNR. Compare these results to the additional examples in Fig. 3

an architecture that contains strides to a recognizable lower resolution [5], the input can be recovered immediately albeit in a smaller resolution when the right parameter vector is sent to the user.

Such a specific choice of parameters is however likely detectable. A subtler approach, as least possible in theory, would be to optimize the network parameters themselves that are sent to the user so that reconstruction quality from these parameters is maximized. While such an attack is likely to be difficult to detect on the user-side, it would also be very computationally intensive.

**Label flipping.** There is even a cheaper alternative. According to Sec. 5, very small gradient vectors may contain less information. A simple way for a dishonest server to boost these gradients is to permute two rows in the weight matrix and bias of the classification layer, effectively flipping the semantic meaning of a label. This attack is difficult to detect for the user (as long as the gradient magnitude stays within usual bounds), but effectively tricks him into differentiating his network w.r.t to the wrong label. Fig. 1 shows that this mechanism can allow for a reliable reconstruction with boosted PSNR scores, as the effect of the trained model is negated.

## B Experimental Details

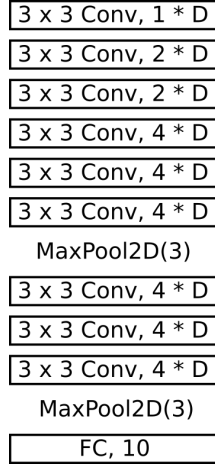

Figure 2: Network architecture *ConvNet*, consisting of 8 convolution layers, specified with corresponding number of output channels. Each convolution layer is followed by a batch normalization layer and a ReLU layer.  $D$  scales the number of output channels and is set to  $D = 64$  by default.

### B.1 Federated Averaging

The extension of Eq. (4) to the case of federated averaging (in which multiple local update steps are taken and sent back to the server) is straightforward. Notice first, that given old parameters  $\theta^k$ , local updates  $\theta^{k+l}$ , learning rate  $\tau$ , and knowledge about the number of update steps<sup>1</sup>, the update can be

<sup>1</sup>We assume that the number of local updates is known to the server, yet this could also be found by brute-force, given that  $l$  is a small integer.

Table 1: Ablation Study for the proposed approach for a trained ResNet-18 architecture, trained on CIFAR-10. Reconstruction PSNR scores are averaged over the first 10 images of the CIFAR-10 validation set (Standard Error in parentheses).

|                                      |                         |
|--------------------------------------|-------------------------|
| Basic Setup                          | 20.12 dB ( $\pm 1.02$ ) |
| L2 Loss instead of cosine similarity | 15.13 dB ( $\pm 0.70$ ) |
| Without total variation              | 19.96 dB ( $\pm 0.75$ ) |
| With L-BFGS instead of Adam          | 5.13 dB ( $\pm 0.50$ )  |

rewritten as the average of updated gradients.

$$\theta^{k+l} = \theta^k - \tau \sum_{m=1}^l \nabla_{\theta^{k+m}} \mathcal{L}_{\theta^{k+m}}(x, y) \quad (1)$$

Subtracting  $\theta^k$  from  $\theta^{k+l}$ , we simply apply the proposed approach to the resulting average of updates:

$$\arg \min_{x \in [0,1]^n} 1 - \frac{\langle \sum_{m=1}^l \nabla_{\theta^{k+m}} \mathcal{L}_{\theta^{k+m}}(x, y), \sum_{m=1}^l \nabla_{\theta^{k+m}} \mathcal{L}_{\theta^{k+m}}(x^*, y) \rangle}{\| \sum_{m=1}^l \nabla_{\theta^{k+m}} \mathcal{L}_{\theta^{k+m}}(x, y) \| \| \sum_{m=1}^l \nabla_{\theta^{k+m}} \mathcal{L}_{\theta^{k+m}}(x^*, y) \|} + \alpha \text{TV}(x). \quad (2)$$

Using automatic differentiation, we backpropagate the gradient w.r.t to  $x$  from the average of update steps.

## B.2 ConvNet

We use a ConvNet architecture as a baseline for our experiments as it is relatively fast to optimize, reaches above 90% accuracy on CIFAR-10 and includes two max-pooling layers. It is a rough analogue to AlexNet [4]. The architecture is described in Fig. 2.

## B.3 Ablation Study

We provide an ablation for proposed choices in Table 1. We note that two things are central, the Adam optimizer and the similarity loss. Total variation is a small benefit, and using signed gradients is a minor benefit.

## C Hyperparameter Settings

In our experiments we reconstruct the network’s input using Adam based on signed gradients as optimization algorithm and cosine similarity as cost function as described in Sec. 4. It is important to note that the optimal hyperparameters for the attack depend on the specific attack scenario - that the attack fails with default parameters is no guarantee for security. We always initialize our reconstructions from a Gaussian distribution with mean 0 and variance 1 (Note that the input data is normalized as usual for all considered datasets) and set the step size of the optimization algorithm within  $[0.01, 1]$ . We use a smaller step sizes of 0.1, for the wider and deeper networks in Sec. 5.2 and a larger step sizes of 1 for the federated averaging experiments in Sec 6, with 0.1 being the default choice. The optimization runs for up to 24000 iterations. The step size decay is always fixed, occurring after  $\frac{3}{8}$ ,  $\frac{5}{8}$  and  $\frac{7}{8}$  of iterations and reducing the learning rate by a factor of 0.1 each time. The number of iterations is a generally conservative estimate, privacy can often be broken much earlier.

We tweak the total variation parameter depending on the specific attack scenario, however note that its effect on avg. PSNR is mostly minor as seen in table 1. When not otherwise noted we default to a value of 0.01.

**Remark (Restarts).** *Generally, multiple restarts of the attack from different random initializations can improve the attack success moderately. However they also increase the computational requirements significantly. To allow for quantitative experimental evaluations of multiple images, we do not consider restarts in this work (aside from Sec. 5 where we apply them to improve results of the competing LBFGS solver) - but stress that an attacker with enough resources could further improve his attack by running it with multiple restarts.*

| Architecture | LeNet (Zhu) |           | ResNet20-4 |           |
|--------------|-------------|-----------|------------|-----------|
| Trained      | False       | True      | False      | True      |
| TV           | $10^{-2}$   | $10^{-3}$ | 0          | $10^{-2}$ |

Table 2: TV regularization values used for the proposed approach in the baseline experiments of Section 5.

|                            |           |           |           |           |           |
|----------------------------|-----------|-----------|-----------|-----------|-----------|
| Number of epochs $E$       | 1         | 1         | 1         | 5         | 5         |
| Number of local images $n$ | 4         | 8         | 8         | 1         | 8         |
| Mini-batch size $B$        | 2         | 2         | 8         | 1         | 8         |
| TV                         | $10^{-6}$ | $10^{-6}$ | $10^{-4}$ | $10^{-4}$ | $10^{-4}$ |

Table 3: Total variation weights for the reconstruction of network input in the experiments in Sec. 4.2

## 82 C.1 Settings for the experiments in Sec. 5

83 **Comparison to previous approaches** For comparison with baselines in section 5, we re-implement  
84 the network from [6], which we dub LeNet (Zhu) in the following, and additionally run all experiments  
85 for the ResNet20-4 architecture. We base both the network and the approach on code from the authors  
86 of [6],<sup>2</sup>. For the LBFGS-L2 optimization we use a learning rate of  $1e-4$  and 300 iterations. For the  
87 ResNet experiments we use the generous amount of 8 restarts and for the faster to optimize LeNet  
88 (Zhu) architecture we use the even higher number of 16 restarts. All experiment conducted with the  
89 proposed approach only use one restart, 4800 iterations, a learning rate of 0.1 and TV regularization  
90 parameters as detailed in Table 2. Note that in the described settings the proposed method took  
91 significantly less time to optimize than the LBFGS optimization.

92 **Spatial Information** The experiments on spatial information are performed on the ConvNet archi-  
93 tecture with  $D = 64$  channels.

## 94 C.2 Setting for experiments in Sec. 6

95 For the five cases consider in Table 2 we consider an untrained ConvNet, a learning rate of 1, 4800  
96 iterations, one restart and the TV regularization parameters as given in table 3. Each of the 100  
97 experiments uses different images, i.e. each experiments uses the images of the CIFAR-10 validation  
98 set following the ones used in the previous experiment. As multiple images of the same label in one  
99 mini-batch cause an ambiguity in the ordering of images w.r.t. that label, we do not consider that case.  
100 If an image with an already encountered label is about to be added to the respective mini-batch we  
101 skip that image and use the next image of the validation set with a different label.

## 102 D Proofs for section 3.1

103 In the following we give a more detailed proof of Prop 3.1, which is follows directly from the two  
104 propositions below:

105 **Proposition D.1.** *Let a neural network contain a biased fully-connected layer at some point, i.e. for*  
106 *the layer’s input  $x_l \in \mathbb{R}^{n_l}$  its output  $x_{l+1} \in \mathbb{R}^{n_{l+1}}$  is calculated as  $x_{l+1} = \max\{y_l, 0\}$  for*

$$y_l = A_l x_l + b_l, \quad (3)$$

107 *for  $A_l \in \mathbb{R}^{n_{l+1} \times n_l}$  and  $b_l \in \mathbb{R}^{n_{l+1}}$ . Then the input  $x_l$  can be reconstructed from  $\frac{d\mathcal{L}}{dA_l}$  and  $\frac{d\mathcal{L}}{db_l}$ , if there*  
108 *exists an index  $i$  s.t.  $\frac{d\mathcal{L}}{d(b_l)_i} \neq 0$ .*

<sup>2</sup><https://github.com/mit-han-lab/dlg>

109 *Proof.* It holds that  $\frac{d\mathcal{L}}{d(b_l)_i} = \frac{d\mathcal{L}}{d(y_l)_i}$  and  $\frac{dy_i}{d(A_l)_{i,:}} = x^T$ . Therefore

$$\frac{d\mathcal{L}}{d(A_l)_{i,:}} = \frac{d\mathcal{L}}{d(y_l)_i} \cdot \frac{d(y_l)_i}{d(A_l)_{i,:}} \quad (4)$$

$$= \frac{d\mathcal{L}}{d(b_l)_i} \cdot x_l^T \quad (5)$$

110 for  $(A_l)_{i,:}$  denoting the  $i^{\text{th}}$  row of  $A_l$ . Hence  $x_l$  can be uniquely determined as soon as  
 111  $\frac{d\mathcal{L}}{d(b_l)_i} \neq 0$ .  $\square$

112 **Proposition D.2.** Consider a fully-connected layer (not necessarily including a bias) followed by  
 113 a ReLU activation function, i.e. for an input  $x_l \in \mathbb{R}^{n_l}$  the output  $x_{l+1} \in \mathbb{R}^{n_{l+1}}$  is calculated as  
 114  $x_{l+1} = \max\{y_l, 0\}$  for

$$y_l = A_l x_l, \quad (6)$$

115 where the maximum is computed element-wise. Now assume we have the additional knowledge of  
 116 the derivative w.r.t. to the output  $\frac{d\mathcal{L}}{dx_{l+1}}$ . Furthermore assume there exists an index  $i$  s.t.  $\frac{d\mathcal{L}}{d(x_{l+1})_i} \neq 0$ .  
 117 Then the input  $v$  can be derived from the knowledge of  $\frac{d\mathcal{L}}{dA_l}$ .

118 *Proof.* As  $\frac{d\mathcal{L}}{d(x_{l+1})_i} \neq 0$  it holds that  $\frac{d\mathcal{L}}{d(y_l)_i} = \frac{d\mathcal{L}}{d(x_{l+1})_i}$  and it follows that

$$\frac{d\mathcal{L}}{d(A_l)_{i,:}} = \frac{d\mathcal{L}}{d(y_l)_i} \cdot \frac{d(y_l)_i}{d(A_l)_{i,:}} \quad (7)$$

$$= \frac{d\mathcal{L}}{d(x_{l+1})_i} \cdot x_l^T. \quad (8)$$

119  $\square$

## 120 E Additional Examples

### 121 E.1 Additional CIFAR-10 examples

122 Figure 3 shows additional "extreme" examples for CIFAR-10, reconstructing the image with lowest  
 123 and the image with largest gradient magnitude for the training and validation set of CIFAR-10 for  
 124 trained and untrained ConvNet and ResNet20-4 models.

### 125 E.2 Visualization of experiments in Sec. 5

126 **Network Width** The reconstructions for the first six CIFAR images for different width ResNet-18  
 127 architectures are given in Fig. 4.

128 **Network Depth** The experiments concerning the network depth are performed for different deep  
 129 ResNet architectures. Multiple reconstruction results for different deep networks are shown in Fig. 5.

### 130 E.3 More ImageNet examples for Sec. 5

131 Fig. 6 shows further instructive examples of reconstructions for ImageNet validation images for a  
 132 trained ResNet-18 (the same setup as Fig. 3 in the main paper). We show a very good reconstruction  
 133 (German shepherd), a good, but translated reconstruction (giant panda) and two failure cases (ambu-  
 134 lance and flower). For the ambulance, for example, the actual writing on the ambulance car is still  
 135 hidden. For the flower, the exact number of petals is hidden. Also, note how the reconstruction of the  
 136 giant panda is much clearer than that of the tree stump co-occurring in the image, which we consider  
 137 an indicator of the self-regularizing effect described in Sec. 5.

138 Figures 7 and 8 show more examples. We note that the examples in these figures and in Figure 3 are  
 139 not handpicked, but chosen neutrally according to their ID in the ILSVRC2012, ImageNet, validation  
 140 set. The ID for each image is obtained by sorting the synset that make up the dataset in increasing  
 141 order according to their synset ID and sorting the images within each synset according to their synset  
 142 ID in increasing order. This is the default order in torchvision.

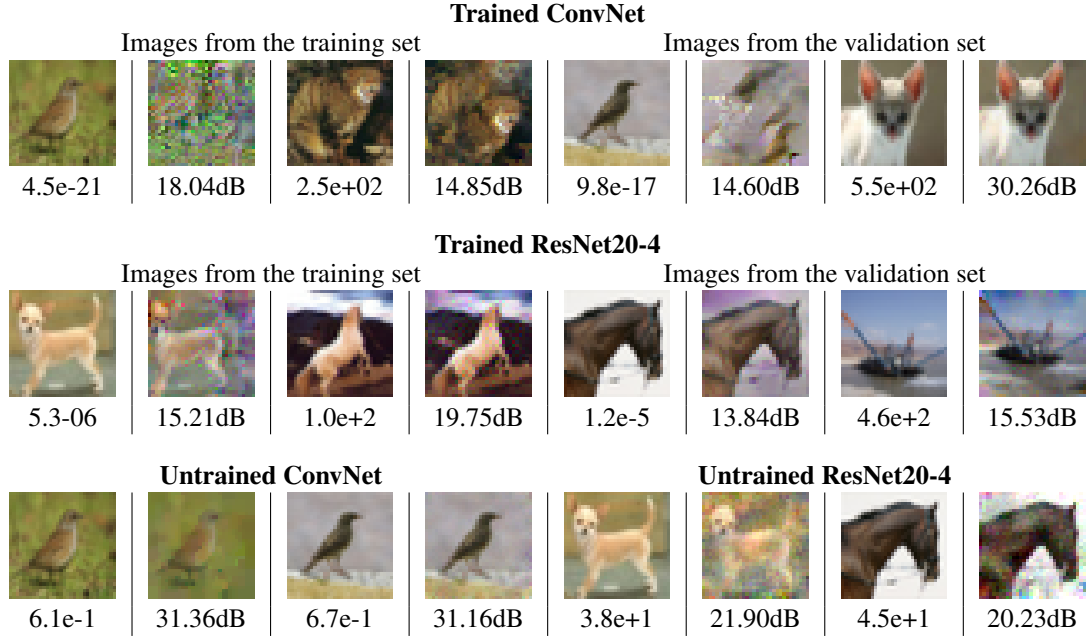

Figure 3: Reconstruction of images for the *trained* ConvNet model (Top) and ResNet20-4 (middle). We show reconstructions of the **worst-case** image and **best case** image from CIFAR-10, based on gradient magnitude for both the training and the validation set. Below each input image is given the gradient magnitude, below each output image its PSNR. The bottom row shows reconstructions for the worst-case examples for untrained models.

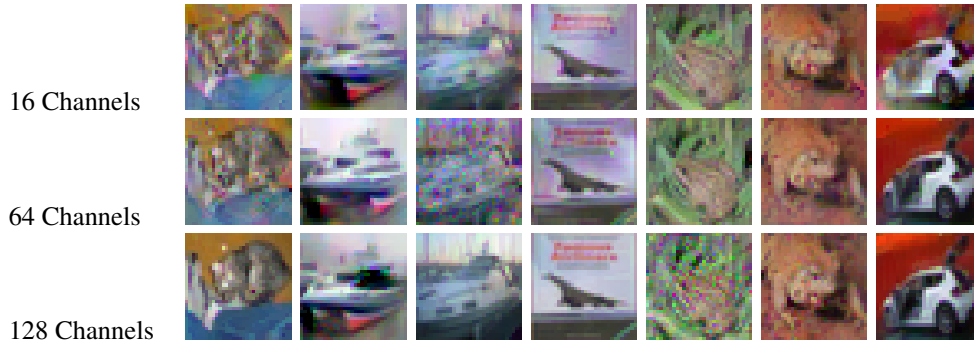

Figure 4: Reconstructions using ResNet-18 architectures with different widths.

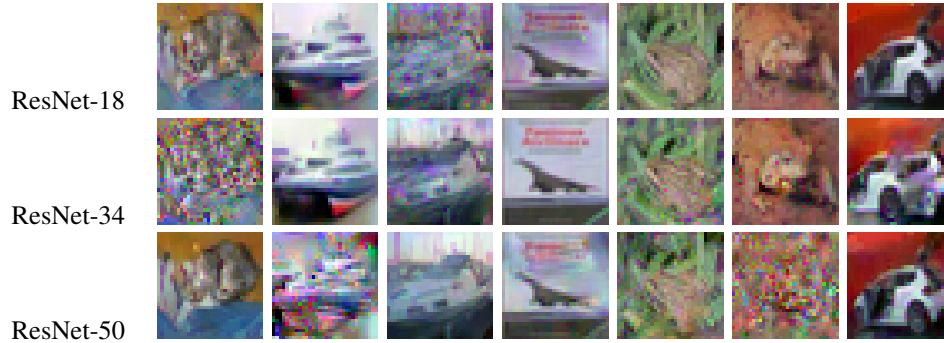

Figure 5: Reconstructions using different deep ResNet architectures.

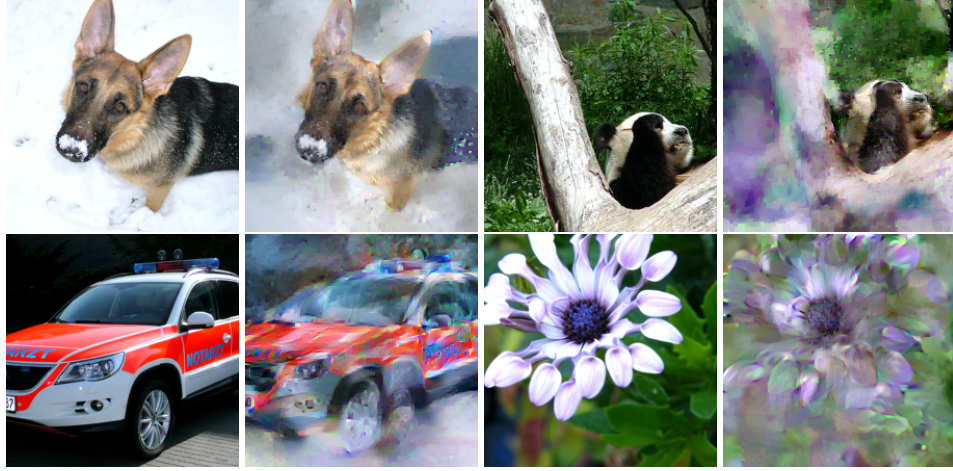

Figure 6: Additional qualitative ImageNet examples, failure cases and positive cases for a trained ResNet-18. Images taken from the ILSVRC2012 validation set.

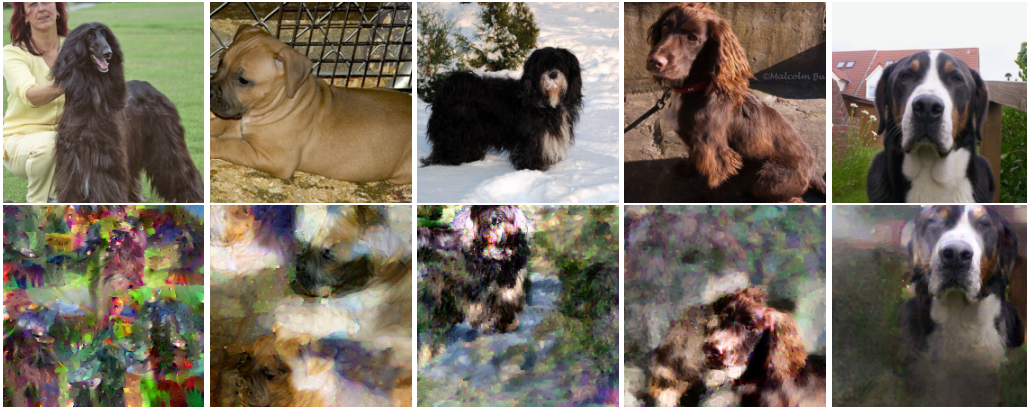

Figure 7: Additional single-image reconstruction from the parameter gradients of trained ResNet-152. Top row: Ground Truth. Bottom row: Reconstruction. The paper showed images 0000, 1000, 2000, 3000, 4000, 5000, 6000, 7000 from the ILSVRC2012 validation set. These are images 8000-12000.

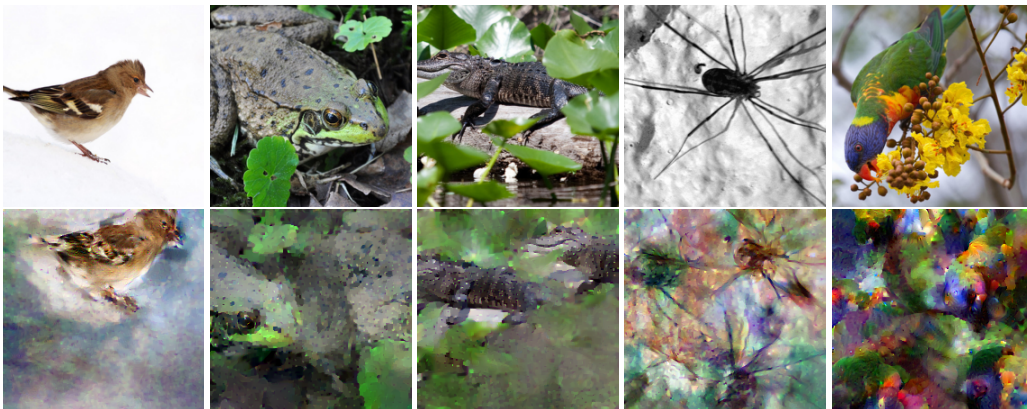

Figure 8: Additional single-image reconstruction from the parameter gradients of trained ResNet-152. Top row: Ground Truth. Bottom row: Reconstruction. These are images 500, 1500, 2500, 3500, 4500.



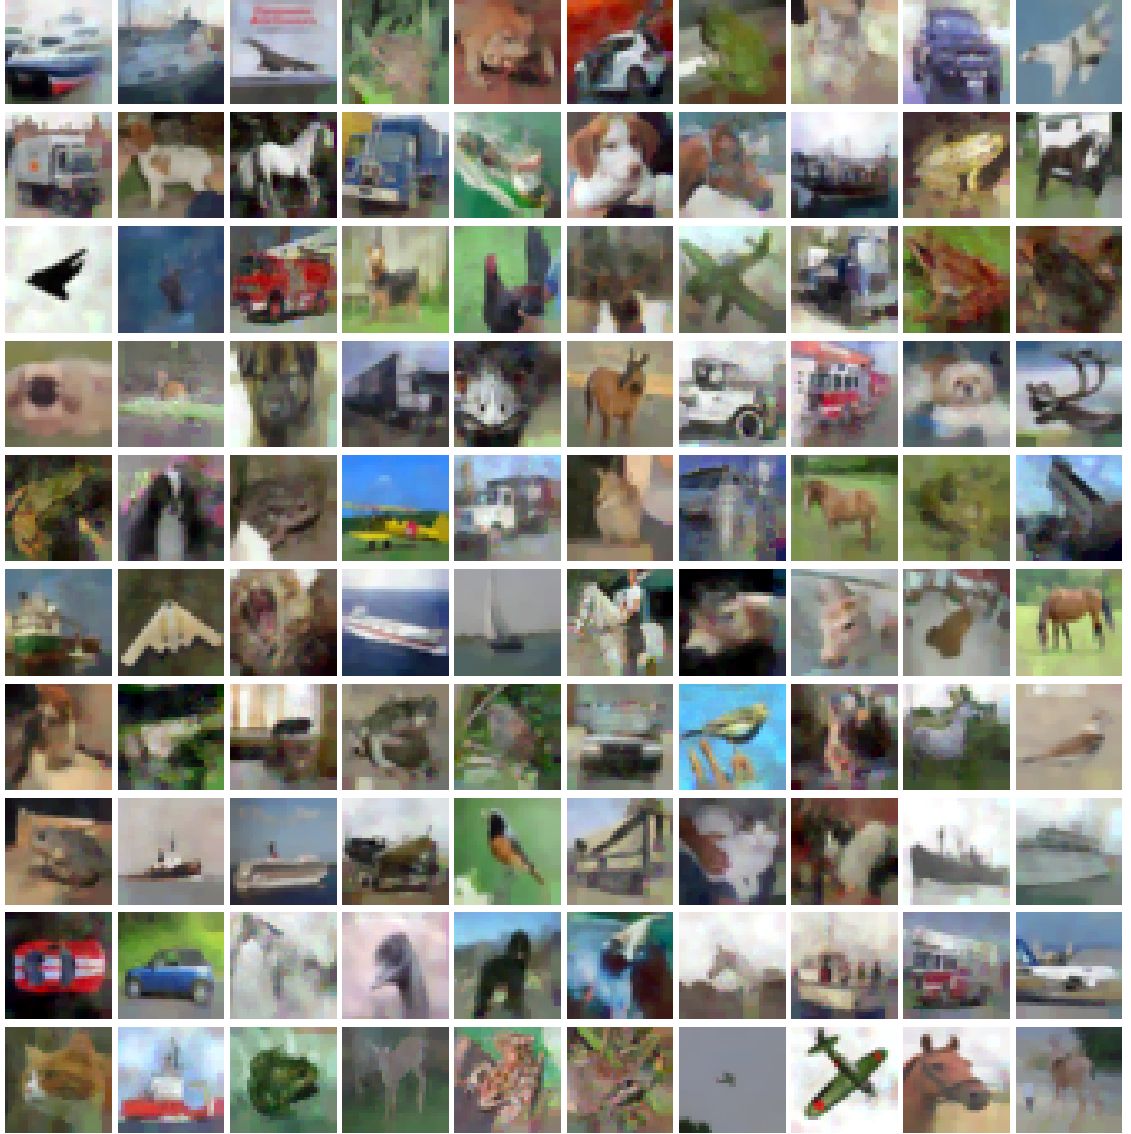

Figure 9: Results of the first 100 experiments for  $E = 5$ ,  $n = 1$ ,  $B = 1$ .

#### 143 **E.4 Multi-Image Recovery of Sec. 6**

144 For multi-image recovery, we show the full set of 100 images in Fig. 14, we recommend to zoom in  
 145 to a digital version of the figure. The success rate for separate images is semi-random, depending on  
 146 the initialization.

#### 147 **E.5 General case of Sec. 6**

148 We show the results for the first ten experiments in Figures 9, 10, 11, 12, 13. In Figure 9 we even  
 149 show all 100 experiments as there only one image is used per experiment.

150

151 Additional images are following on the next pages.



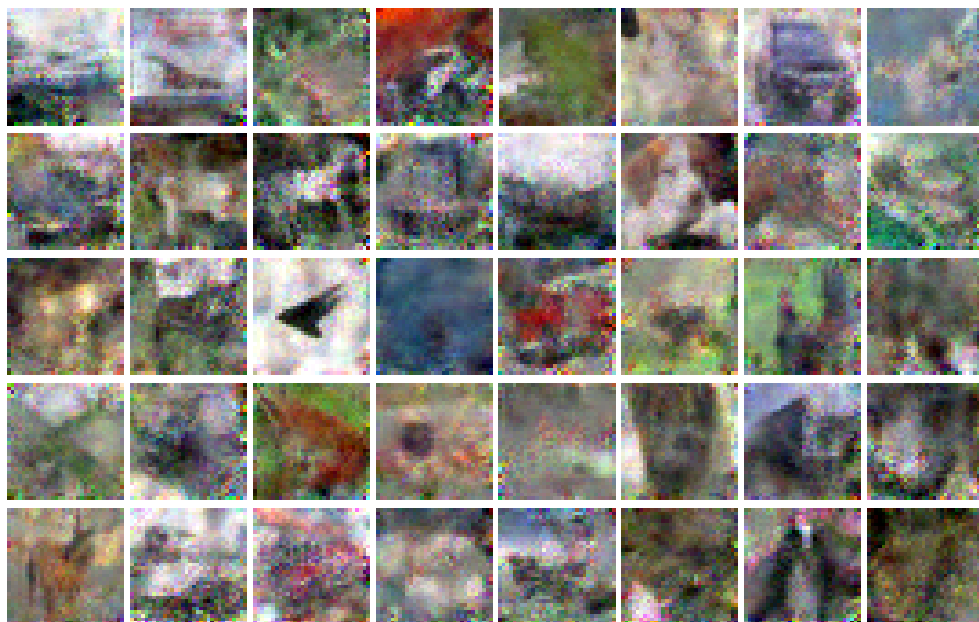

Figure 10: Results of the first ten experiments for  $E = 1$ ,  $n = 4$ ,  $B = 2$ .

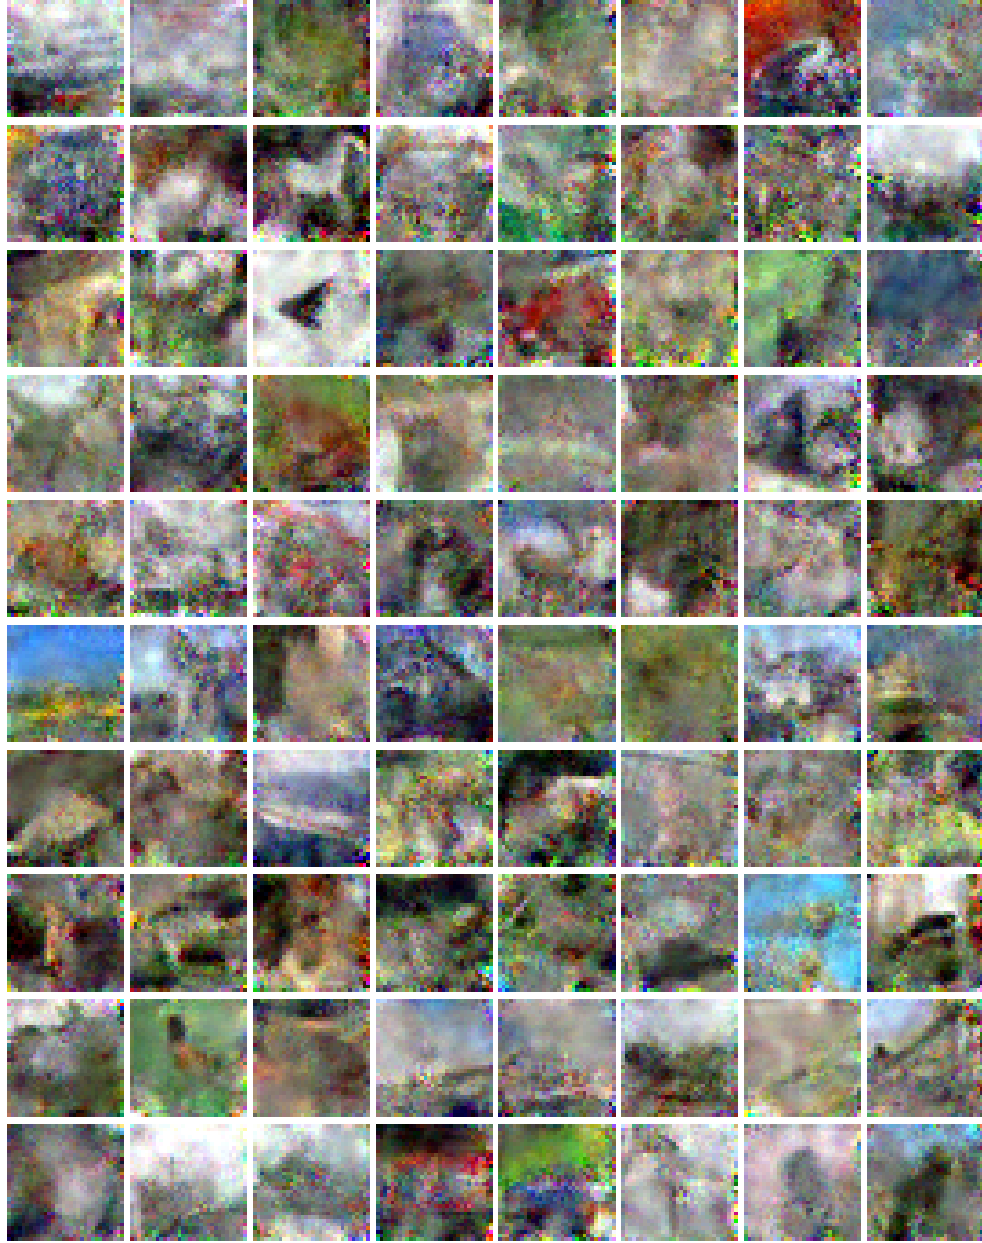

Figure 11: Results of the first ten experiments for  $E = 1$ ,  $n = 8$ ,  $B = 2$ .

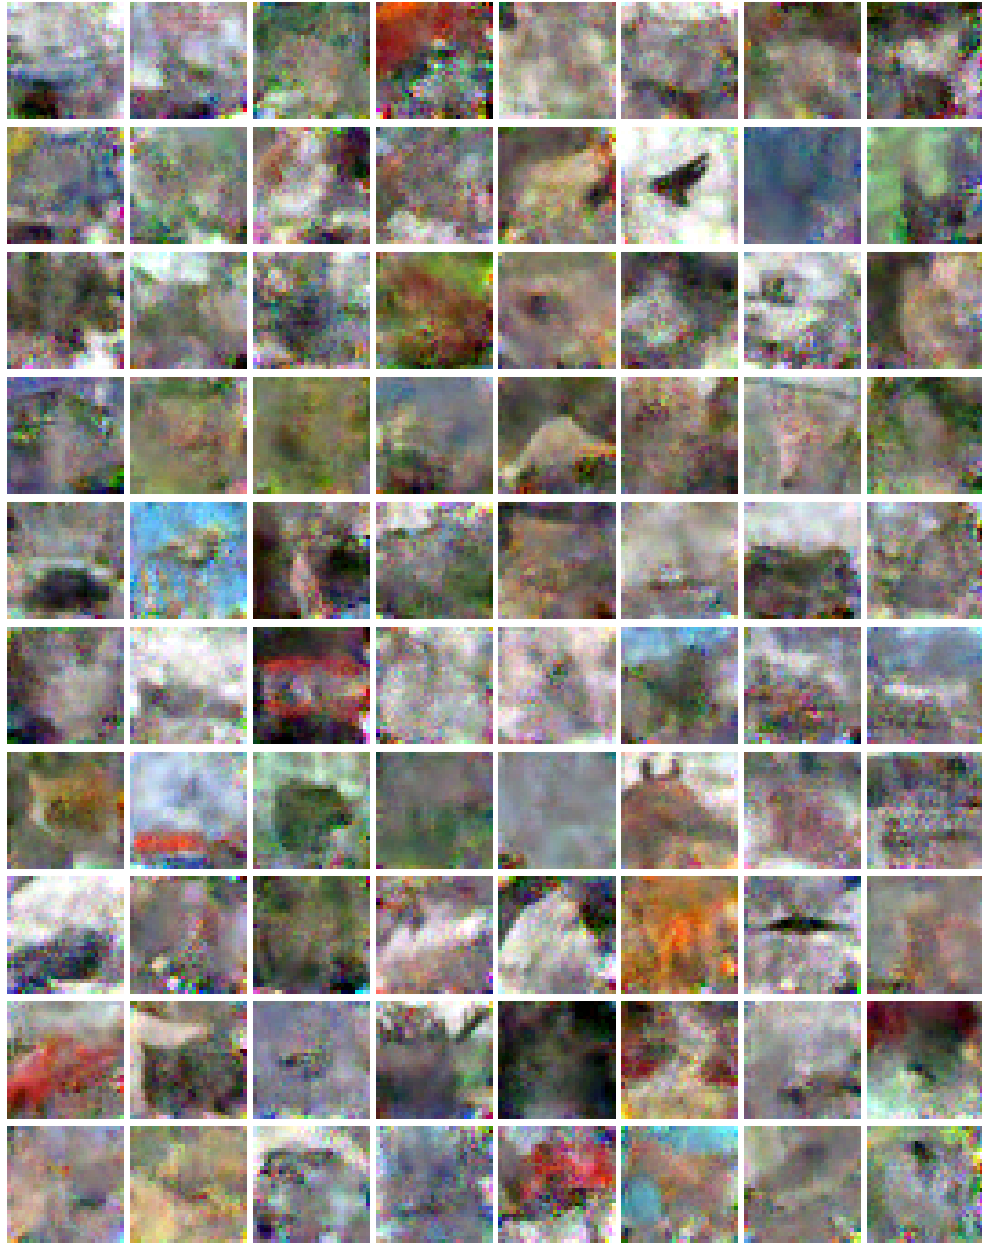

Figure 12: Results of the first ten experiments for  $E = 1$ ,  $n = 8$ ,  $B = 8$ .

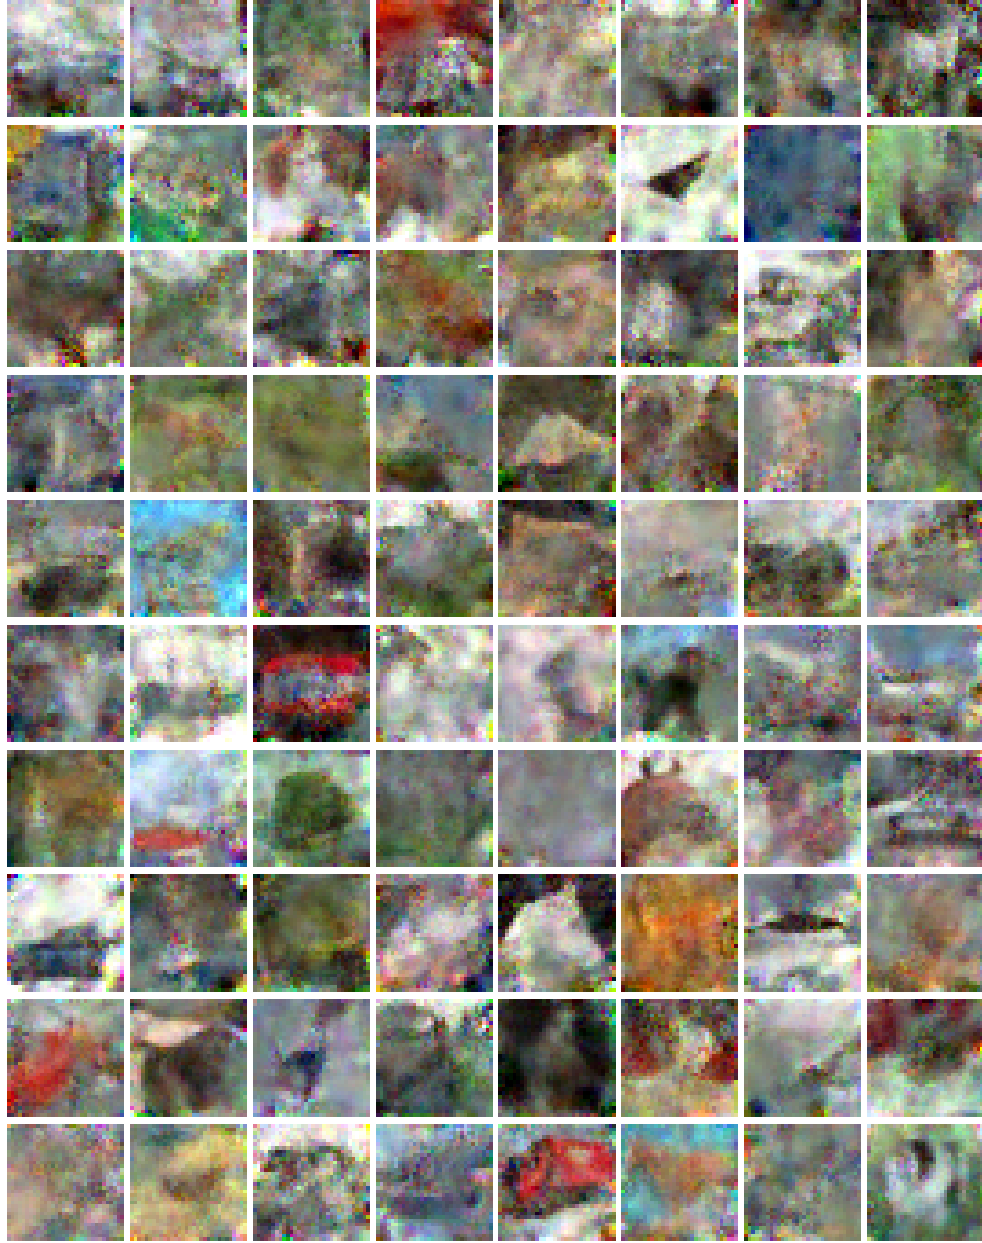

Figure 13: Results of the first ten experiments for  $E = 5$ ,  $n = 8$ ,  $B = 8$ .

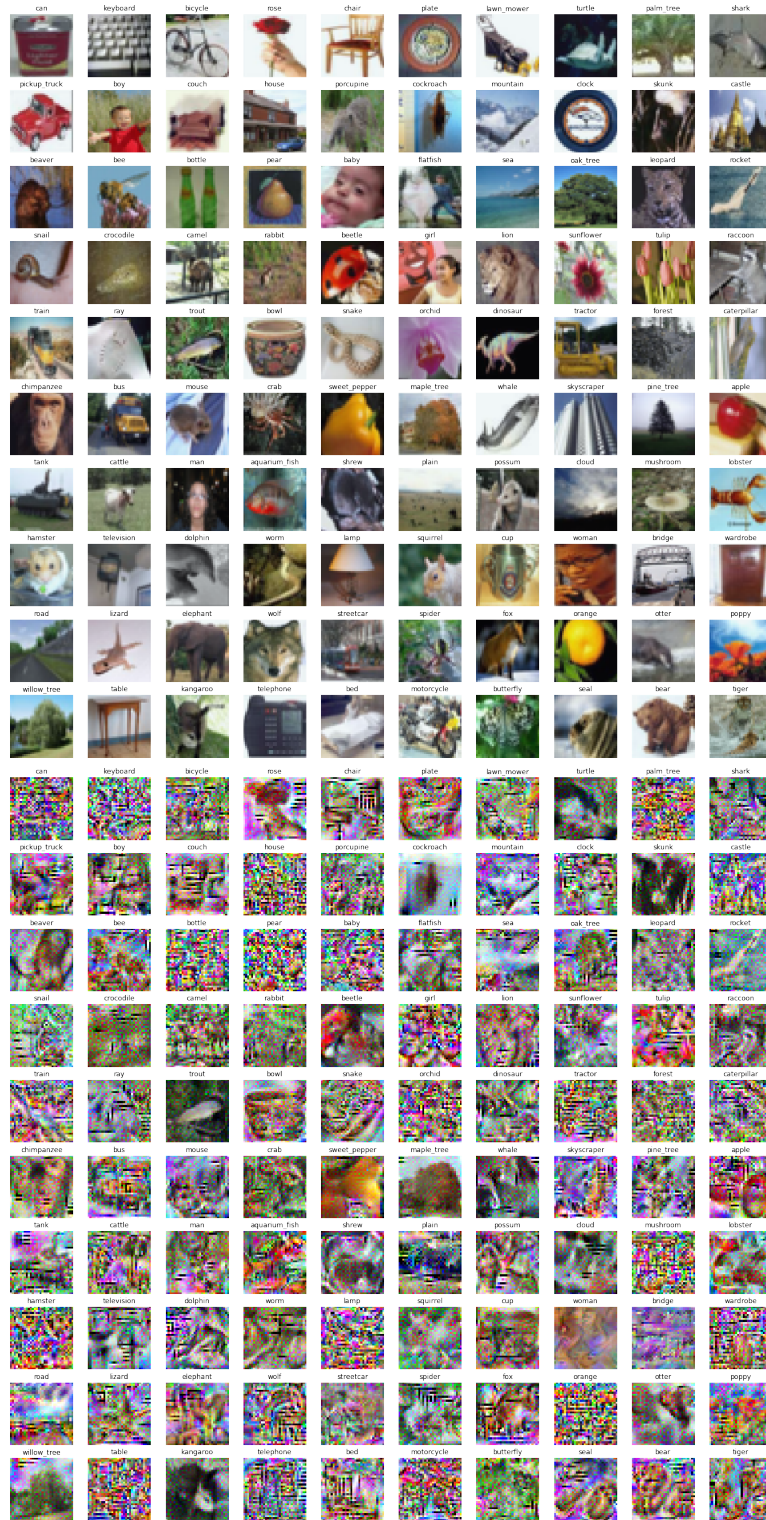

Figure 14: Full results for the batch of CIFAR-100 images. Same experiment as in Fig. 6 of the paper.

## References

- [1] Bo Chang, Lili Meng, Eldad Haber, Lars Ruthotto, David Begert, and Elliot Holtham. Reversible Architectures for Arbitrarily Deep Residual Neural Networks. *arXiv:1709.03698 [cs, stat]*, September 2017.
- [2] Micah Goldblum, Jonas Geiping, Avi Schwarzschild, Michael Moeller, and Tom Goldstein. Truth or Backpropaganda? An Empirical Investigation of Deep Learning Theory. *arXiv:1910.00359 [cs, math, stat]*, October 2019.
- [3] Jörn-Henrik Jacobsen, Arnold Smeulders, and Edouard Oyallon. I-RevNet: Deep Invertible Networks. *arXiv:1802.07088 [cs, stat]*, February 2018.
- [4] Alex Krizhevsky, Ilya Sutskever, and Geoffrey E. Hinton. Imagenet classification with deep convolutional neural networks. In *Advances in Neural Information Processing Systems*, pages 1097–1105, 2012.
- [5] Zhibo Wang, Mengkai Song, Zhifei Zhang, Yang Song, Qian Wang, and Hairong Qi. Beyond Inferring Class Representatives: User-Level Privacy Leakage From Federated Learning. *arXiv:1812.00535 [cs]*, December 2018.
- [6] Ligeng Zhu, Zhijian Liu, and Song Han. Deep Leakage from Gradients. In *Advances in Neural Information Processing Systems* 32, pages 14774–14784. Curran Associates, Inc., 2019.
